# Supplementary material
Source: PubMed Central journal article supplement (PMC6487206)
Supplement: NIHMS1518648-supplement-10719_2019_9858_MOESM1_ESM.pdf [file NIHMS1518648-supplement-10719_2019_9858_MOESM1_ESM.pdf]

# Compositional and structural analysis of glycosaminoglycans in cell-derived extracellular matrices

João C. Silva<sup>1,2,4</sup>, Marta S. Carvalho<sup>1,3,4</sup>, Xiaorui Han<sup>2</sup>, Ke Xia<sup>2</sup>, Paiyz E. Mikael<sup>2</sup>, Joaquim M. S. Cabral<sup>1,4</sup>, Frederico Castelo Ferreira<sup>1,4</sup> and Robert J. Linhardt<sup>2,3\*</sup>

## Supplementary information

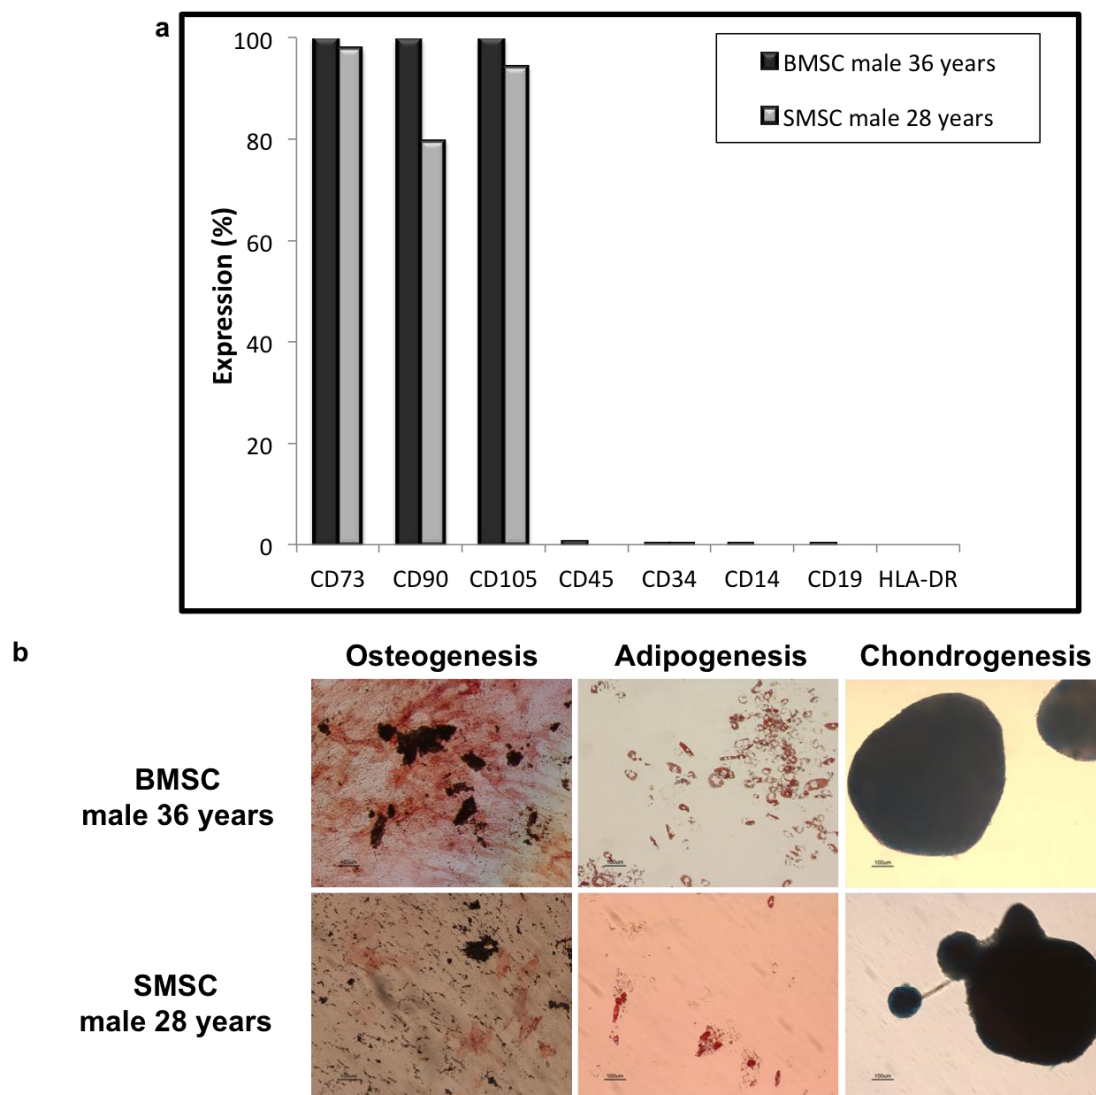

**Supplementary Figure 1** Characterization of MSC isolated from bone marrow aspirates (BMSC) collected from a male donor (36 years) and of MSC isolated from synovium aspirates obtained from a male donor (28 years). (a) Immunophenotypic characterization of BMSC and SMSC assessed by flow cytometry. (b) Multi-lineage differentiation potential of BMSC and SMSC. Osteogenic, adipogenic and chondrogenic differentiation was confirmed after 14 days induction by ALP/von Kossa, Oil Red-O and Alcian Blue staining, respectively.

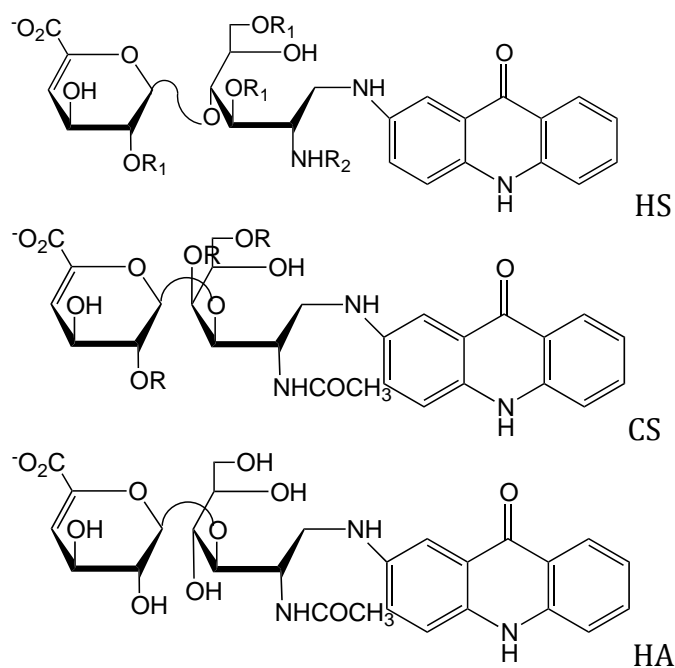

**Supplementary Figure 2** Structures of AMAC derivatized disaccharides used in LC-MS/MS analysis.

**Supplementary Table 1.** Total GAG amounts obtained for the different cell-derived ECM produced from chondrocytes, BMSC and SMSC presented as ng of GAG/mg of dry ECM. Results are presented as mean  $\pm$  SD of three independent samples (n=3).

|                        | Total GAG (ng/mg) |                 |                 |                  |
|------------------------|-------------------|-----------------|-----------------|------------------|
|                        | HS                | CS              | HA              | Total            |
| <i>Chondrocyte-ECM</i> | 15.7 $\pm$ 3.5    | 86.4 $\pm$ 35.5 | 10.3 $\pm$ 5.6  | 112.4 $\pm$ 43.6 |
| <i>BMSC-ECM</i>        | 39.4 $\pm$ 16.4   | 79.4 $\pm$ 22.6 | 88.0 $\pm$ 19.6 | 206.8 $\pm$ 44.0 |
| <i>SMSC-ECM</i>        | 7.7 $\pm$ 0.8     | 34.6 $\pm$ 2.3  | 31.5 $\pm$ 8.4  | 73.8 $\pm$ 9.5   |

**Supplementary Table 2.** HS and CS disaccharides amounts obtained for the different cell-derived ECM produced from chondrocytes, BMSC and SMSC presented as ng of GAG/mg of dry ECM. Results are presented as mean  $\pm$  SD of three independent samples (n=3).

| <b>HS disaccharide (ng/mg)</b> |               |               |               |                |                 |                 |               |                |
|--------------------------------|---------------|---------------|---------------|----------------|-----------------|-----------------|---------------|----------------|
|                                | <b>TriS</b>   | <b>NS6S</b>   | <b>NS2S</b>   | <b>NS</b>      | <b>2S6S</b>     | <b>6S</b>       | <b>2S</b>     | <b>0S</b>      |
| <i>Chondrocyte-ECM</i>         | 0.0 $\pm$ 0.0 | 0.3 $\pm$ 0.3 | 3.1 $\pm$ 0.3 | 3.2 $\pm$ 0.6  | 0.0 $\pm$ 0.0   | 0.4 $\pm$ 0.1   | 0.2 $\pm$ 0.2 | 8.4 $\pm$ 2.5  |
| <i>BMSC-ECM</i>                | 0.0 $\pm$ 0.0 | 0.2 $\pm$ 0.0 | 1.5 $\pm$ 0.9 | 11.1 $\pm$ 5.1 | 0.0 $\pm$ 0.0   | 1.1 $\pm$ 0.5   | 0.2 $\pm$ 0.2 | 25.3 $\pm$ 9.9 |
| <i>SMSC-ECM</i>                | 0.0 $\pm$ 0.0 | 0.1 $\pm$ 0.0 | 1.0 $\pm$ 0.1 | 1.1 $\pm$ 0.4  | 0.0 $\pm$ 0.0   | 0.3 $\pm$ 0.2   | 0.0 $\pm$ 0.0 | 5.2 $\pm$ 0.3  |
| <b>CS disaccharide (ng/mg)</b> |               |               |               |                |                 |                 |               |                |
|                                | <b>TriS</b>   | <b>2S4S</b>   | <b>2S6S</b>   | <b>4S6S</b>    | <b>4S</b>       | <b>6S</b>       | <b>2S</b>     | <b>0S</b>      |
| <i>Chondrocyte-ECM</i>         | 0.0 $\pm$ 0.0 | 0.1 $\pm$ 0.0 | 2.2 $\pm$ 1.1 | 0.3 $\pm$ 0.2  | 22.8 $\pm$ 8.0  | 54.8 $\pm$ 23.1 | 0.2 $\pm$ 0.2 | 6.0 $\pm$ 3.0  |
| <i>BMSC-ECM</i>                | 0.0 $\pm$ 0.0 | 0.2 $\pm$ 0.2 | 0.7 $\pm$ 0.6 | 0.3 $\pm$ 0.1  | 43.3 $\pm$ 10.7 | 32.9 $\pm$ 10.7 | 0.2 $\pm$ 0.2 | 1.9 $\pm$ 0.6  |
| <i>SMSC-ECM</i>                | 0.0 $\pm$ 0.0 | 0.0 $\pm$ 0.0 | 0.3 $\pm$ 0.1 | 0.9 $\pm$ 0.1  | 19.2 $\pm$ 1.5  | 13.3 $\pm$ 1.1  | 0.0 $\pm$ 0.0 | 0.9 $\pm$ 0.2  |

**Supplementary Table 3.** Total GAG amounts presented as ng/dish for the different cell-derived ECM and respective cell culture monolayers prior to decellularization treatment. Results are presented as mean  $\pm$  SD of three independent samples (n=3).

|                        | <b>Total GAG (ng/dish)</b> |                   |                   |                    |
|------------------------|----------------------------|-------------------|-------------------|--------------------|
|                        | <b>HS</b>                  | <b>CS</b>         | <b>HA</b>         | <b>Total</b>       |
| <i>Chondrocyte</i>     | 209.5 $\pm$ 24.6           | 338.2 $\pm$ 42.2  | 125.0 $\pm$ 11.8  | 672.7 $\pm$ 70.9   |
| <i>Chondrocyte-ECM</i> | 27.9 $\pm$ 6.3             | 153.6 $\pm$ 63.1  | 18.3 $\pm$ 10.0   | 199.8 $\pm$ 77.5   |
| <i>BMSC</i>            | 105.7 $\pm$ 11.5           | 113.9 $\pm$ 14.3  | 873.8 $\pm$ 160.3 | 1093.4 $\pm$ 184.4 |
| <i>BMSC-ECM</i>        | 42.4 $\pm$ 17.7            | 85.6 $\pm$ 24.3   | 94.9 $\pm$ 21.2   | 222.9 $\pm$ 47.5   |
| <i>SMSC</i>            | 57.8 $\pm$ 3.5             | 334.8 $\pm$ 178.7 | 86.5 $\pm$ 17.1   | 479.1 $\pm$ 199.3  |
| <i>SMSC-ECM</i>        | 14.0 $\pm$ 1.4             | 63.0 $\pm$ 4.2    | 57.5 $\pm$ 15.4   | 134.4 $\pm$ 17.3   |

**Supplementary Table 4.** HS and CS disaccharide amounts presented as ng/dish for the different cell-derived ECM and respective cell culture monolayers prior to decellularization treatment. Results are presented as mean  $\pm$  SD of three independent samples (n=3).

| <b>HS disaccharide (ng/dish)</b> |               |               |                |                |                   |                 |               |                  |
|----------------------------------|---------------|---------------|----------------|----------------|-------------------|-----------------|---------------|------------------|
|                                  | <b>TriS</b>   | <b>NS6S</b>   | <b>NS2S</b>    | <b>NS</b>      | <b>2S6S</b>       | <b>6S</b>       | <b>2S</b>     | <b>0S</b>        |
| <i>Chondrocyte</i>               | 0.0 $\pm$ 0.0 | 1.5 $\pm$ 0.0 | 23.8 $\pm$ 2.3 | 38.8 $\pm$ 5.4 | 0.1 $\pm$ 0.1     | 4.6 $\pm$ 1.0   | 0.3 $\pm$ 0.0 | 140.4 $\pm$ 16.9 |
| <i>Chondrocyte-ECM</i>           | 0.0 $\pm$ 0.0 | 0.5 $\pm$ 0.5 | 5.4 $\pm$ 0.5  | 5.7 $\pm$ 1.1  | 0.0 $\pm$ 0.0     | 0.8 $\pm$ 0.3   | 0.4 $\pm$ 0.3 | 14.9 $\pm$ 4.5   |
| <i>BMSC</i>                      | 0.0 $\pm$ 0.0 | 0.4 $\pm$ 0.0 | 16.6 $\pm$ 2.1 | 28.8 $\pm$ 3.2 | 0.1 $\pm$ 0.1     | 0.0 $\pm$ 0.0   | 0.0 $\pm$ 0.0 | 59.8 $\pm$ 6.1   |
| <i>BMSC-ECM</i>                  | 0.0 $\pm$ 0.0 | 0.2 $\pm$ 0.0 | 1.6 $\pm$ 1.0  | 11.9 $\pm$ 5.5 | 0.0 $\pm$ 0.0     | 1.2 $\pm$ 0.5   | 0.2 $\pm$ 0.2 | 27.2 $\pm$ 10.7  |
| <i>SMSC</i>                      | 0.1 $\pm$ 0.0 | 0.2 $\pm$ 0.2 | 4.3 $\pm$ 0.4  | 7.5 $\pm$ 1.3  | 0.0 $\pm$ 0.0     | 0.8 $\pm$ 0.5   | 3.4 $\pm$ 0.6 | 41.5 $\pm$ 0.9   |
| <i>SMSC-ECM</i>                  | 0.0 $\pm$ 0.0 | 0.1 $\pm$ 0.1 | 1.7 $\pm$ 0.2  | 2.1 $\pm$ 0.8  | 0.0 $\pm$ 0.0     | 0.5 $\pm$ 0.4   | 0.1 $\pm$ 0.0 | 9.4 $\pm$ 0.5    |
| <b>CS disaccharide (ng/dish)</b> |               |               |                |                |                   |                 |               |                  |
|                                  | <b>TriS</b>   | <b>2S4S</b>   | <b>2S6S</b>    | <b>4S6S</b>    | <b>4S</b>         | <b>6S</b>       | <b>2S</b>     | <b>0S</b>        |
| <i>Chondrocyte</i>               | 0.0 $\pm$ 0.0 | 4.8 $\pm$ 0.3 | 9.0 $\pm$ 1.0  | 4.5 $\pm$ 0.2  | 257.0 $\pm$ 40.0  | 58.0 $\pm$ 1.8  | 0.3 $\pm$ 0.0 | 4.5 $\pm$ 0.5    |
| <i>Chondrocyte-ECM</i>           | 0.0 $\pm$ 0.0 | 0.2 $\pm$ 0.1 | 3.9 $\pm$ 2.0  | 0.6 $\pm$ 0.4  | 40.5 $\pm$ 14.1   | 97.4 $\pm$ 41.1 | 0.4 $\pm$ 0.3 | 10.6 $\pm$ 5.4   |
| <i>BMSC</i>                      | 0.0 $\pm$ 0.0 | 1.1 $\pm$ 0.3 | 1.0 $\pm$ 0.1  | 1.3 $\pm$ 0.4  | 85.5 $\pm$ 11.7   | 20.9 $\pm$ 3.4  | 0.0 $\pm$ 0.0 | 4.1 $\pm$ 0.5    |
| <i>BMSC-ECM</i>                  | 0.0 $\pm$ 0.0 | 0.2 $\pm$ 0.2 | 0.7 $\pm$ 0.6  | 0.3 $\pm$ 0.1  | 46.7 $\pm$ 11.5   | 35.5 $\pm$ 11.5 | 0.2 $\pm$ 0.2 | 2.0 $\pm$ 0.7    |
| <i>SMSC</i>                      | 0.1 $\pm$ 0.0 | 0.2 $\pm$ 0.0 | 2.0 $\pm$ 0.3  | 4.6 $\pm$ 0.7  | 233.3 $\pm$ 114.4 | 74.9 $\pm$ 55.8 | 3.4 $\pm$ 0.6 | 16.3 $\pm$ 7.0   |
| <i>SMSC-ECM</i>                  | 0.0 $\pm$ 0.0 | 0.1 $\pm$ 0.0 | 0.5 $\pm$ 0.2  | 1.6 $\pm$ 0.1  | 35.0 $\pm$ 2.7    | 24.1 $\pm$ 2.0  | 0.1 $\pm$ 0.0 | 1.6 $\pm$ 0.4    |

**Supplementary Table 5.** Average percentage GAG composition for the different cell-derived ECM and respective cell culture monolayers prior to decellularization treatment. Results are presented as mean  $\pm$  SD of three independent samples (n=3).

|                        | Total GAG relative % |            |            |
|------------------------|----------------------|------------|------------|
|                        | HS                   | CS         | HA         |
| <i>Chondrocyte</i>     | 31 $\pm$ 2           | 50 $\pm$ 1 | 19 $\pm$ 2 |
| <i>Chondrocyte-ECM</i> | 15 $\pm$ 3           | 77 $\pm$ 2 | 9 $\pm$ 4  |
| <i>BMSC</i>            | 10 $\pm$ 1           | 10 $\pm$ 1 | 80 $\pm$ 2 |
| <i>BMSC-ECM</i>        | 18 $\pm$ 5           | 38 $\pm$ 6 | 43 $\pm$ 9 |
| <i>SMSC</i>            | 13 $\pm$ 5           | 68 $\pm$ 9 | 19 $\pm$ 4 |
| <i>SMSC-ECM</i>        | 10 $\pm$ 1           | 47 $\pm$ 6 | 42 $\pm$ 7 |

**Supplementary Table 6.** Average percentage HS and CS disaccharide composition for the different cell-derived ECM and respective cell culture monolayers prior to decellularization treatment. Results are presented as mean  $\pm$  SD of three independent samples (n=3).

| HS disaccharide relative % |           |           |            |            |            |            |           |            |
|----------------------------|-----------|-----------|------------|------------|------------|------------|-----------|------------|
|                            | TriS      | NS6S      | NS2S       | NS         | 2S6S       | 6S         | 2S        | 0S         |
| <i>Chondrocyte</i>         | 0 $\pm$ 0 | 1 $\pm$ 0 | 11 $\pm$ 0 | 18 $\pm$ 1 | 0 $\pm$ 0  | 2 $\pm$ 0  | 0 $\pm$ 0 | 67 $\pm$ 1 |
| <i>Chondrocyte-ECM</i>     | 0 $\pm$ 0 | 2 $\pm$ 2 | 20 $\pm$ 3 | 21 $\pm$ 1 | 0 $\pm$ 0  | 3 $\pm$ 1  | 1 $\pm$ 1 | 53 $\pm$ 4 |
| <i>BMSC</i>                | 0 $\pm$ 0 | 0 $\pm$ 0 | 16 $\pm$ 0 | 27 $\pm$ 0 | 0 $\pm$ 0  | 0 $\pm$ 0  | 0 $\pm$ 0 | 57 $\pm$ 0 |
| <i>BMSC-ECM</i>            | 0 $\pm$ 0 | 1 $\pm$ 0 | 4 $\pm$ 1  | 28 $\pm$ 2 | 0 $\pm$ 0  | 3 $\pm$ 0  | 0 $\pm$ 0 | 65 $\pm$ 3 |
| <i>SMSC</i>                | 0 $\pm$ 0 | 0 $\pm$ 0 | 7 $\pm$ 0  | 13 $\pm$ 1 | 0 $\pm$ 0  | 1 $\pm$ 1  | 6 $\pm$ 1 | 72 $\pm$ 3 |
| <i>SMSC-ECM</i>            | 0 $\pm$ 0 | 0 $\pm$ 0 | 12 $\pm$ 1 | 15 $\pm$ 4 | 0 $\pm$ 0  | 4 $\pm$ 3  | 0 $\pm$ 0 | 68 $\pm$ 3 |
| CS disaccharide relative % |           |           |            |            |            |            |           |            |
|                            | TriS      | 2S4S      | 2S6S       | 4S6S       | 4S         | 6S         | 2S        | 0S         |
| <i>Chondrocyte</i>         | 0 $\pm$ 0 | 1 $\pm$ 0 | 3 $\pm$ 0  | 1 $\pm$ 0  | 76 $\pm$ 2 | 17 $\pm$ 2 | 0 $\pm$ 0 | 1 $\pm$ 0  |
| <i>Chondrocyte-ECM</i>     | 0 $\pm$ 0 | 0 $\pm$ 0 | 2 $\pm$ 0  | 0 $\pm$ 0  | 27 $\pm$ 2 | 63 $\pm$ 1 | 0 $\pm$ 0 | 7 $\pm$ 1  |
| <i>BMSC</i>                | 0 $\pm$ 0 | 1 $\pm$ 0 | 1 $\pm$ 0  | 1 $\pm$ 0  | 75 $\pm$ 1 | 18 $\pm$ 1 | 0 $\pm$ 0 | 4 $\pm$ 1  |
| <i>BMSC-ECM</i>            | 0 $\pm$ 0 | 0 $\pm$ 0 | 1 $\pm$ 0  | 0 $\pm$ 0  | 55 $\pm$ 3 | 41 $\pm$ 2 | 0 $\pm$ 0 | 2 $\pm$ 0  |
| <i>SMSC</i>                | 0 $\pm$ 0 | 0 $\pm$ 0 | 1 $\pm$ 0  | 2 $\pm$ 1  | 71 $\pm$ 4 | 21 $\pm$ 6 | 1 $\pm$ 0 | 5 $\pm$ 1  |
| <i>SMSC-ECM</i>            | 0 $\pm$ 0 | 0 $\pm$ 0 | 1 $\pm$ 0  | 3 $\pm$ 0  | 56 $\pm$ 1 | 38 $\pm$ 1 | 0 $\pm$ 0 | 3 $\pm$ 1  |
